# Supplementary material for: Modulation of pulsatile GnRH dynamics across the ovarian cycle via changes in the network excitability and basal activity of the arcuate kisspeptin network
Source: eLife journal article supplement (doi:10.7554/elife.71252), 2021-11-17
Supplement: supp [file elife-71252-supp-v1.zip]

Archive with 5 entries (5 files):
- elife_poa_e71252_Transparent_Reporting_File.docx
- elife_poa_e71252_Figure_2_figure_supplement_1.pdf
- elife_poa_e71252_Figure_2_figure_supplement_2.pdf
- elife_poa_e71252_Figure_3_figure_supplement_1.pdf
- elife_poa_e71252_Figure_6_figure_supplement_1.pdf
