# Supplementary figures and images for: Modulation of pulsatile GnRH dynamics across the ovarian cycle via changes in the network excitability and basal activity of the arcuate kisspeptin network
Source: eLife journal article supplement (doi:10.7554/elife.71252), 2021-11-17

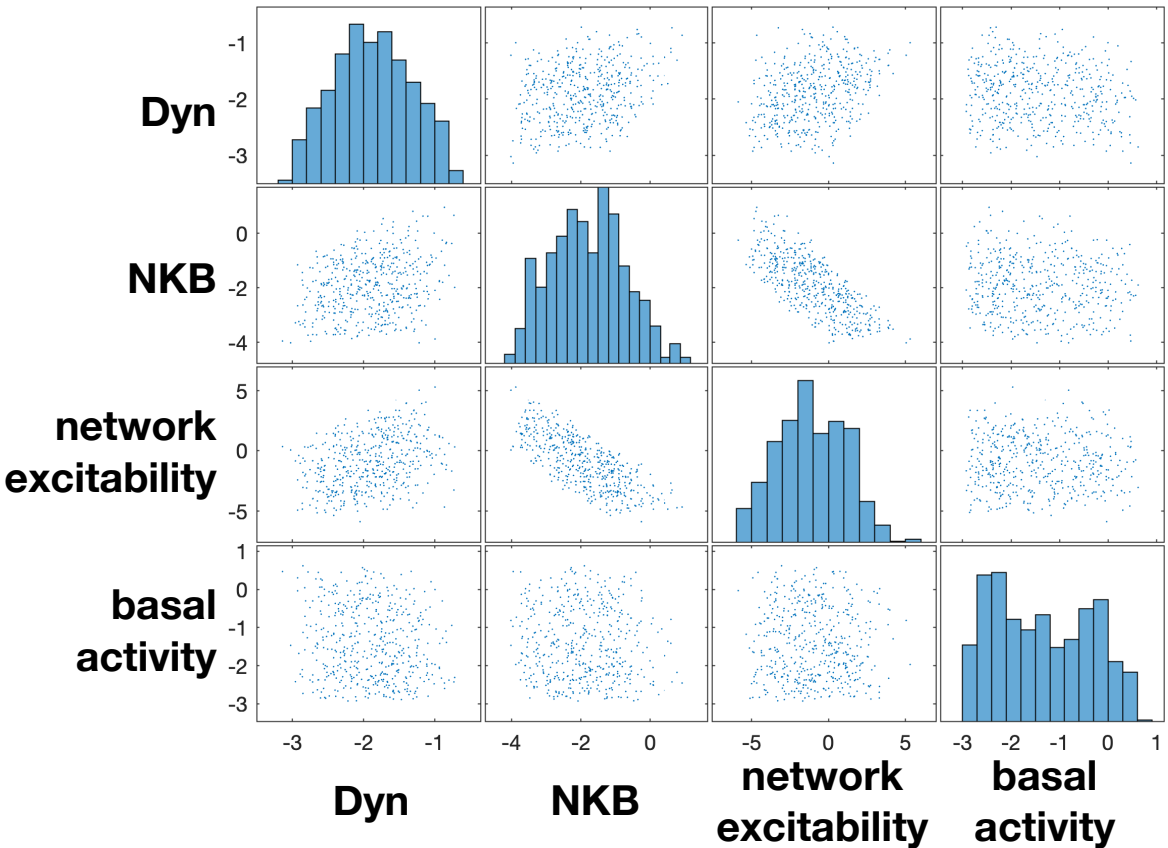

Supplement: supp [file elife-71252-supp-v1.zip]

# Diestrus

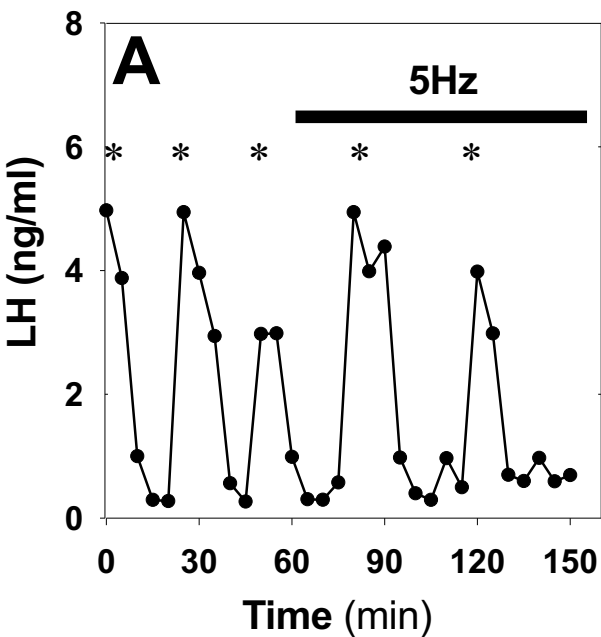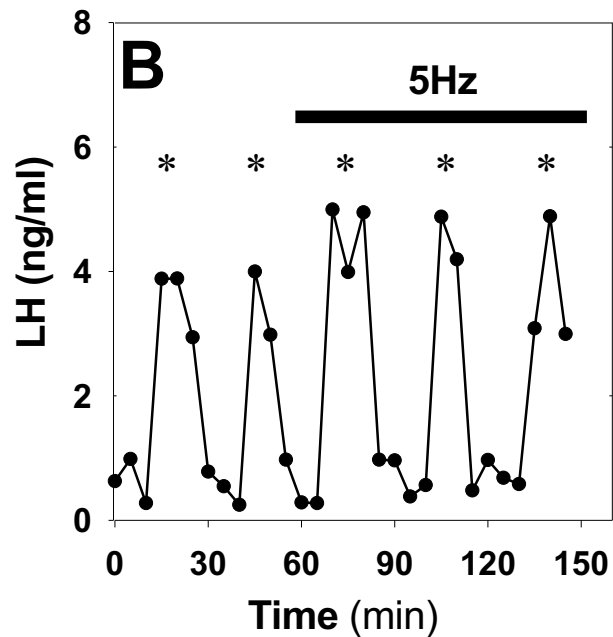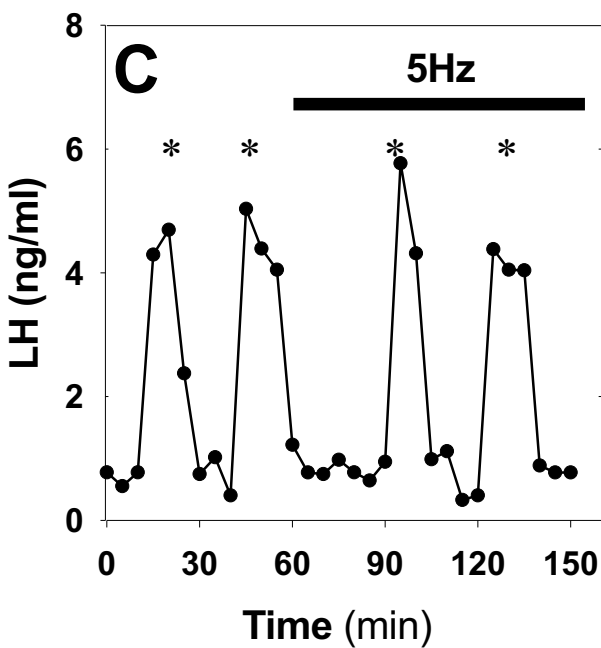

Supplement: supp [file elife-71252-supp-v1.zip › elife_poa_e71252_Figure_2_figure_supplement_1.pdf]

# WT Diestrus

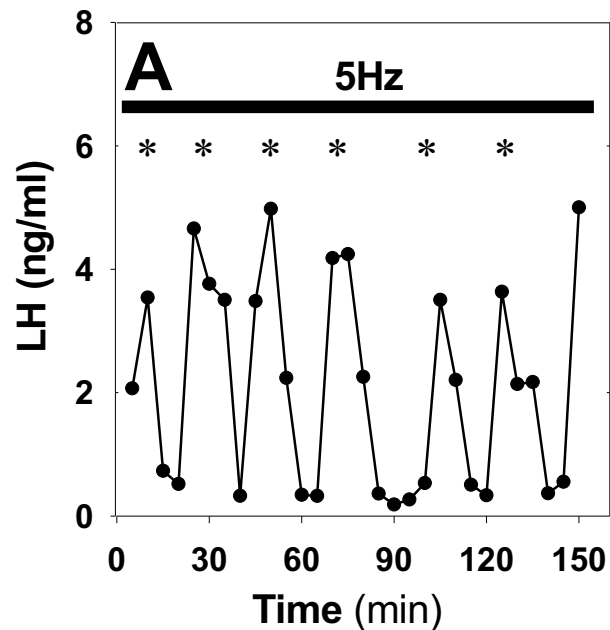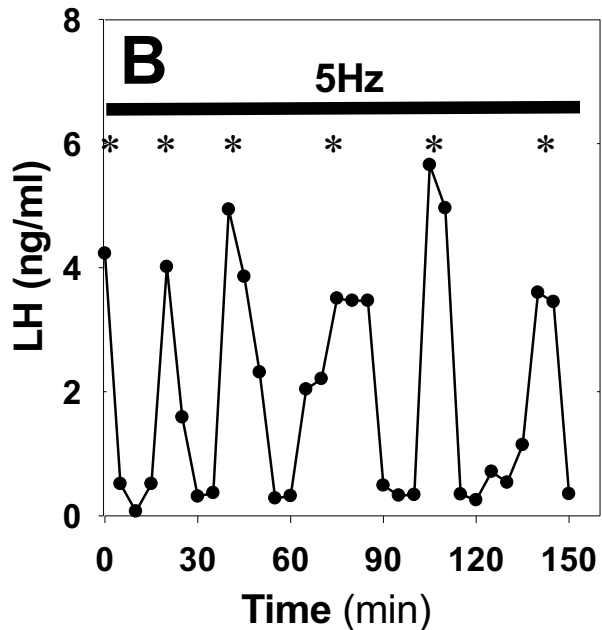

Supplement: supp [file elife-71252-supp-v1.zip › elife_poa_e71252_Figure_2_figure_supplement_2.pdf]

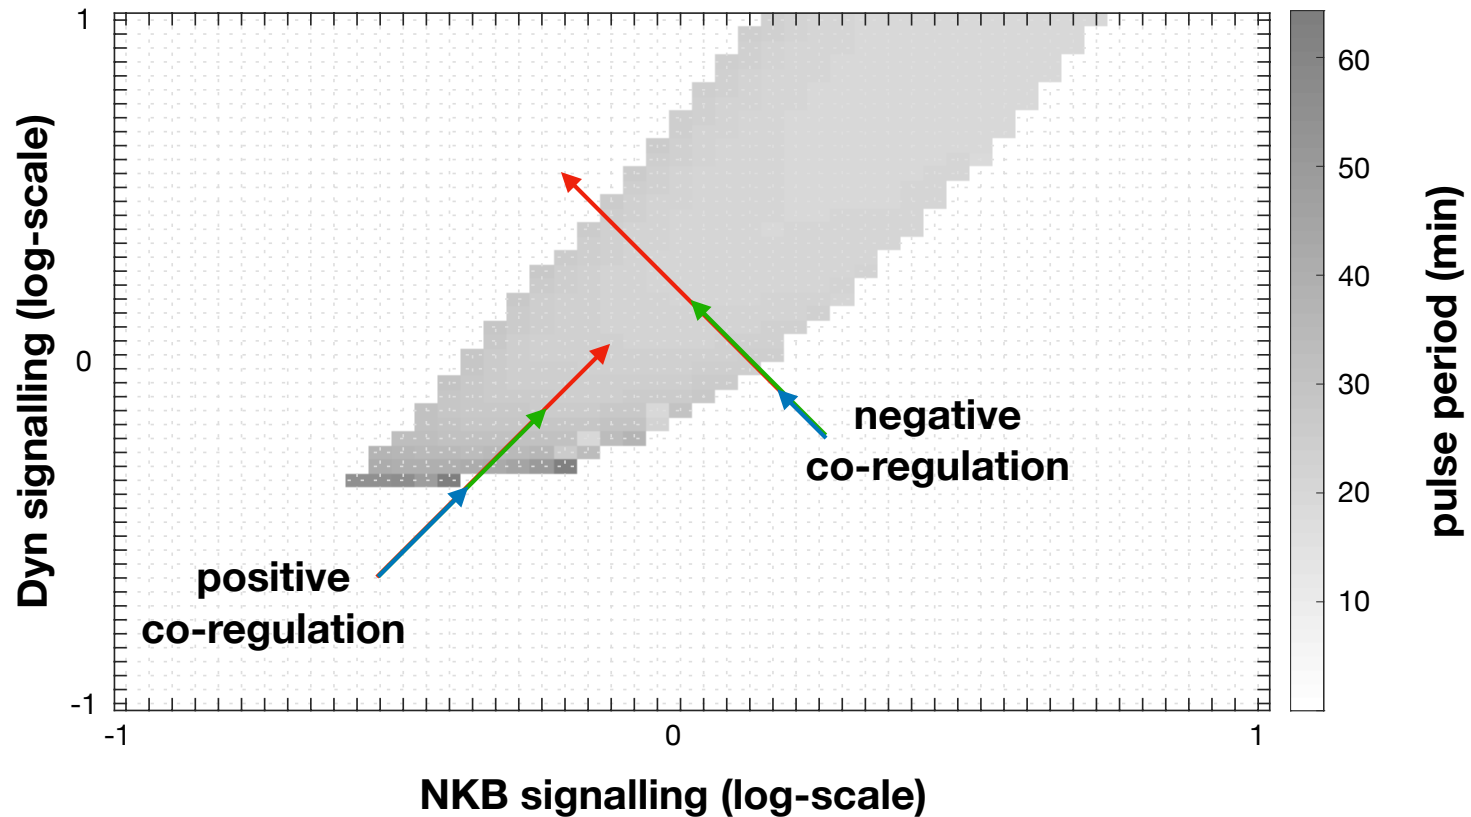

Supplement: supp [file elife-71252-supp-v1.zip › elife_poa_e71252_Figure_6_figure_supplement_1.pdf]
